# Supplementary material
Source: Springer Nature journal article supplement (https://www.springermedizin.de/resource/supplementary/12885_2009_1785_MOESM2_ESM.pdf/9472948)
Supplement: MOESM2 [file 9472948]

papers citing controlled studies  
n=52

publication of the same results twice  
n=8

usage of 2 different mistletoe extracts  
n=4

papers citing controlled studies  
n=40

no extra treatment  
n=35

alternative / placebo treatment  
n=5

studies with extractable data  
n=22

extracted strata  
n=41
